# Supplementary material for: Diglycolamic acid for the mutual separation of lanthanides and actinides from dilute nitric acid solution: solvent extraction, dynamic light scattering, and spectroscopic investigations
Source: Royal Society of Chemistry journal article supplement (doi:10.1039/d3nj02840b), 2023-11-22

### Supplementary information

NJ-ART-06-2023-002840.R1

#### Diglycolamic acid for the mutual separation of lanthanides and actinides from dilute nitric acid solution: solvent extraction, dynamic light scattering, and spectroscopic investigations

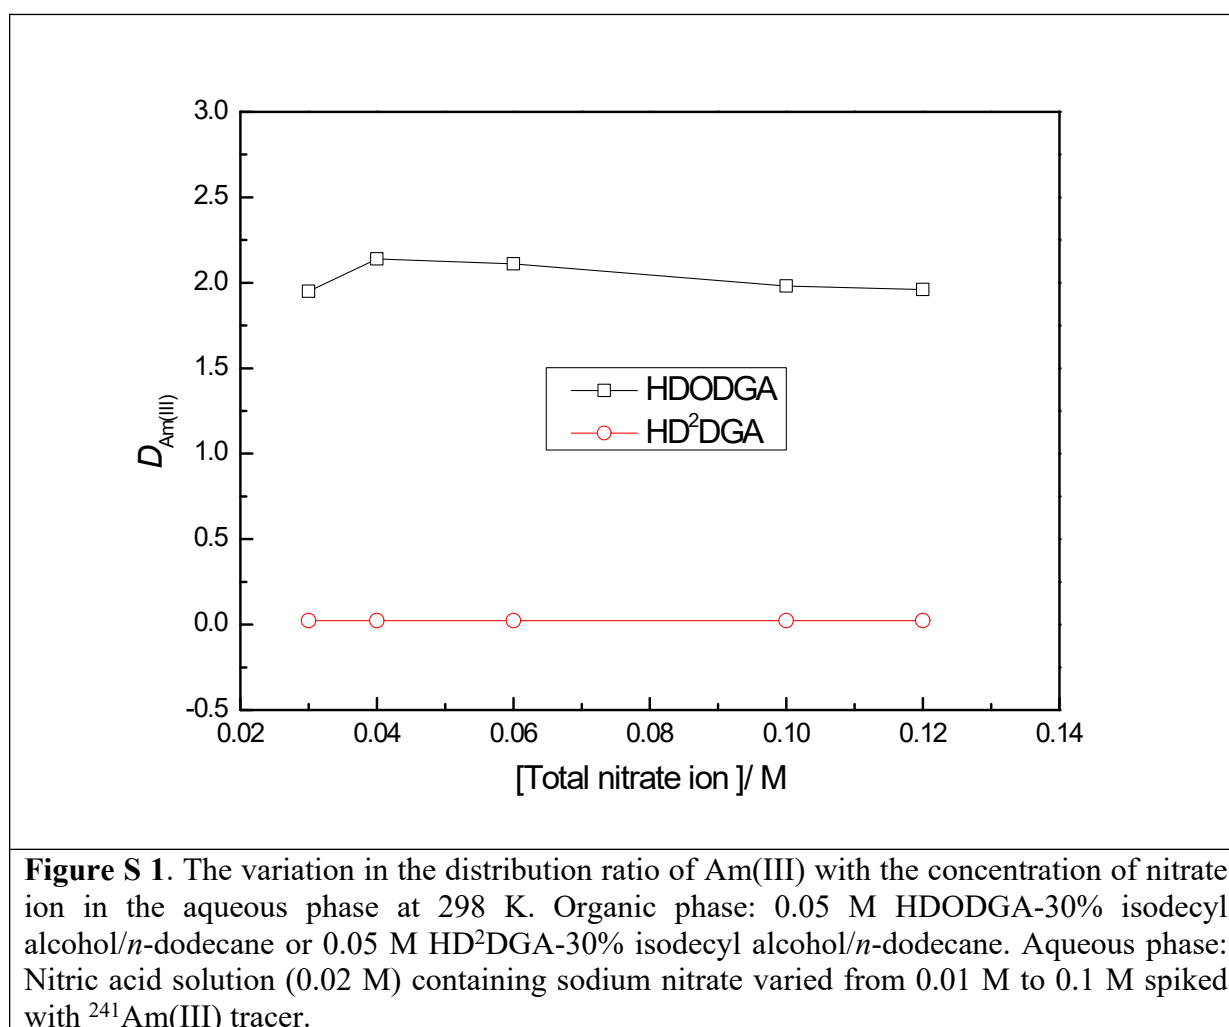

Supplement: d3nj02840b1.pdf [file d3nj02840b1.pdf]
